# Supplementary material
Source: ML conference proceedings conference paper supplement (https://openreview.net/forum?id=CAqdG2dy5s)
Supplement: supplementary_material [file attachment]

## Sheet: country-capitals
CountryName	location	latitude	longitude	CountryCode	ContinentName		KG_labels
Somaliland	Hargeisa	9.55	44.05	NULL	Africa		BSh
South Georgia and South Sandwich Islands	King Edward Point	-54.2833	-36.5	GS	Antarctica		ET
French Southern and Antarctic Lands	Port-aux-Français	-49.35	70.2167	TF	Antarctica		ET
Palestine	Jerusalem	31.7667	35.2333	PS	Asia		Csa
Aland Islands	Mariehamn	60.1167	19.9	AX	Europe		Cfb
Nauru	Yaren	-0.5477	166.921	NR	Australia		Af
Saint Martin	Marigot	18.0731	-63.0822	MF	North America		Aw
Tokelau	Atafu	-9.16667	-171.833	TK	Australia		Af
Western Sahara	El-Aaiún	27.1536	-13.2033	EH	Africa		BWh
Afghanistan	Kabul	34.5167	69.1833	AF	Asia		BSk
Albania	Tirana	41.3167	19.8167	AL	Europe		Csa
Algeria	Algiers	36.75	3.05	DZ	Africa		Csa
American Samoa	Pago Pago	-14.2667	-170.7	AS	Australia		Af
Andorra	Andorra la Vella	42.5	1.51667	AD	Europe		Cfb
Angola	Luanda	-8.83333	13.2167	AO	Africa		BSh
Anguilla	The Valley	18.2167	-63.05	AI	North America		Aw
Antigua and Barbuda	Saint John's	17.1167	-61.85	AG	North America		Aw
Argentina	Buenos Aires	-34.5833	-58.6667	AR	South America		Cfa
Armenia	Yerevan	40.1667	44.5	AM	Europe		Dfa
Aruba	Oranjestad	12.5167	-70.0333	AW	North America		Am
Australia	Canberra	-35.2667	149.133	AU	Australia		Cfb
Austria	Vienna	48.2	16.3667	AT	Europe		Cfb
Azerbaijan	Baku	40.3833	49.8667	AZ	Europe		BSk
Bahamas	Nassau	25.0833	-77.35	BS	North America		Aw
Bahrain	Manama	26.2333	50.5667	BH	Asia		BWh
Bangladesh	Dhaka	23.7167	90.4	BD	Asia		Aw
Barbados	Bridgetown	13.1	-59.6167	BB	North America		Am
Belarus	Minsk	53.9	27.5667	BY	Europe		Dfb
Belgium	Brussels	50.8333	4.33333	BE	Europe		Cfb
Belize	Belmopan	17.25	-88.7667	BZ	Central America		Aw
Benin	Porto-Novo	6.48333	2.61667	BJ	Africa		BWh
Bermuda	Hamilton	32.2833	-64.7833	BM	North America		Cfb
Bhutan	Thimphu	27.4667	89.6333	BT	Asia		ET
Bolivia	La Paz	-16.5	-68.15	BO	South America		Cwc
Bosnia and Herzegovina	Sarajevo	43.8667	18.4167	BA	Europe		Cfb
Botswana	Gaborone	-24.6333	25.9	BW	Africa		BSh
Brazil	Brasilia	-15.7833	-47.9167	BR	South America		Aw
British Virgin Islands	Road Town	18.4167	-64.6167	VG	North America		Aw
Brunei Darussalam	Bandar Seri Begawan	4.88333	114.933	BN	Asia		Af
Bulgaria	Sofia	42.6833	23.3167	BG	Europe		Cfb
Burkina Faso	Ouagadougou	12.3667	-1.51667	BF	Africa		Aw
Myanmar	Rangoon	16.8	96.15	MM	Asia		Am
Burundi	Bujumbura	-3.36667	29.35	BI	Africa		Aw
Cambodia	Phnom Penh	11.55	104.917	KH	Asia		Am
Cameroon	Yaounde	3.86667	11.5167	CM	Africa		Aw
Canada	Ottawa	45.4167	-75.7	CA	Central America		Dfb
Cape Verde	Praia	14.9167	-23.5167	CV	Africa		BWh
Cayman Islands	George Town	19.3	-81.3833	KY	North America		Af
Central African Republic	Bangui	4.36667	18.5833	CF	Africa		Aw
Chad	N'Djamena	12.1	15.0333	TD	Africa		BSh
Chile	Santiago	-33.45	-70.6667	CL	South America		Af
China	Beijing	39.9167	116.383	CN	Asia		Dwa
Christmas Island	The Settlement	-10.4167	105.717	CX	Australia		Aw
Cocos Islands	West Island	-12.1667	96.8333	CC	Australia		Af
Colombia	Bogota	4.6	-74.0833	CO	South America		Csb
Comoros	Moroni	-11.7	43.2333	KM	Africa		Af
Democratic Republic of the Congo	Kinshasa	-4.31667	15.3	CD	Africa		Aw
Republic of Congo	Brazzaville	-4.25	15.2833	CG	Africa		Aw
Cook Islands	Avarua	-21.2	-159.767	CK	Australia		Af
Costa Rica	San Jose	9.93333	-84.0833	CR	Central America		Am
Cote d'Ivoire	Yamoussoukro	6.81667	-5.26667	CI	Africa		Aw
Croatia	Zagreb	45.8	16	HR	Europe		Cfb
Cuba	Havana	23.1167	-82.35	CU	North America		Aw
Curaçao	Willemstad	12.1	-68.9167	CW	North America		Aw
Cyprus	Nicosia	35.1667	33.3667	CY	Europe		BSh
Czech Republic	Prague	50.0833	14.4667	CZ	Europe		Cfb
Denmark	Copenhagen	55.6667	12.5833	DK	Europe		Cfb
Djibouti	Djibouti	11.5833	43.15	DJ	Africa		BWh
Dominica	Roseau	15.3	-61.4	DM	North America		Af
Dominican Republic	Santo Domingo	18.4667	-69.9	DO	North America		Aw
Ecuador	Quito	-0.216667	-78.5	EC	South America		Cfb
Egypt	Cairo	30.05	31.25	EG	Africa		BWh
El Salvador	San Salvador	13.7	-89.2	SV	Central America		Aw
Equatorial Guinea	Malabo	3.75	8.78333	GQ	Africa		Am
Eritrea	Asmara	15.3333	38.9333	ER	Africa		BSh
Estonia	Tallinn	59.4333	24.7167	EE	Europe		Dfb
Ethiopia	Addis Ababa	9.03333	38.7	ET	Africa		Cwb
Falkland Islands	Stanley	-51.7	-57.85	FK	South America		ET
Faroe Islands	Torshavn	62	-6.76667	FO	Europe		Cfc
Fiji	Suva	-18.1333	178.417	FJ	Australia		Af
Finland	Helsinki	60.1667	24.9333	FI	Europe		Dfb
France	Paris	48.8667	2.33333	FR	Europe		Cfb
French Polynesia	Papeete	-17.5333	-149.567	PF	Australia		Af
Gabon	Libreville	0.383333	9.45	GA	Africa		Aw
The Gambia	Banjul	13.45	-16.5667	GM	Africa		Aw
Georgia	Tbilisi	41.6833	44.8333	GE	Europe		Cfa
Germany	Berlin	52.5167	13.4	DE	Europe		Cfb
Ghana	Accra	5.55	-0.216667	GH	Africa		Aw
Gibraltar	Gibraltar	36.1333	-5.35	GI	Europe		Csa
Greece	Athens	37.9833	23.7333	GR	Europe		Csa
Greenland	Nuuk	64.1833	-51.75	GL	Central America		ET
Grenada	Saint George's	12.05	-61.75	GD	North America		Aw
Guam	Hagatna	13.4667	144.733	GU	Australia		Af
Guatemala	Guatemala City	14.6167	-90.5167	GT	Central America		Cwb
Guernsey	Saint Peter Port	49.45	-2.53333	GG	Europe		Cfb
Guinea	Conakry	9.5	-13.7	GN	Africa		Am
Guinea-Bissau	Bissau	11.85	-15.5833	GW	Africa		Aw
Guyana	Georgetown	6.8	-58.15	GY	South America		Af
Haiti	Port-au-Prince	18.5333	-72.3333	HT	North America		Aw
Honduras	Tegucigalpa	14.1	-87.2167	HN	Central America		Aw
Hungary	Budapest	47.5	19.0833	HU	Europe		Dfb
Iceland	Reykjavik	64.15	-21.95	IS	Europe		Cfc
India	New Delhi	28.6	77.2	IN	Asia		Cfa
Indonesia	Jakarta	-6.16667	106.817	ID	Asia		Af
Iran	Tehran	35.7	51.4167	IR	Asia		Csa
Iraq	Baghdad	33.3333	44.4	IQ	Asia		BWh
Ireland	Dublin	53.3167	-6.23333	IE	Europe		Cfb
Isle of Man	Douglas	54.15	-4.48333	IM	Europe		Cfb
Italy	Rome	41.9	12.4833	IT	Europe		Csa
Jamaica	Kingston	18	-76.8	JM	North America		Aw
Japan	Tokyo	35.6833	139.75	JP	Asia		Cfa
Jersey	Saint Helier	49.1833	-2.1	JE	Europe		Cfb
Jordan	Amman	31.95	35.9333	JO	Asia		BSh
Kazakhstan	Astana	51.1667	71.4167	KZ	Asia		Dfb
Kenya	Nairobi	-1.28333	36.8167	KE	Africa		Cfb
Kiribati	Tarawa	-0.883333	169.533	KI	Australia		Af
North Korea	Pyongyang	39.0167	125.75	KP	Asia		Dwa
South Korea	Seoul	37.55	126.983	KR	Asia		Dwa
Kosovo	Pristina	42.6667	21.1667	KO	Europe		Cfb
Kuwait	Kuwait City	29.3667	47.9667	KW	Asia		BWh
Kyrgyzstan	Bishkek	42.8667	74.6	KG	Asia		Dfb
Laos	Vientiane	17.9667	102.6	LA	Asia		Aw
Latvia	Riga	56.95	24.1	LV	Europe		Dfb
Lebanon	Beirut	33.8667	35.5	LB	Asia		Csa
Lesotho	Maseru	-29.3167	27.4833	LS	Africa		Cwb
Liberia	Monrovia	6.3	-10.8	LR	Africa		Am
Libya	Tripoli	32.8833	13.1667	LY	Africa		BSh
Liechtenstein	Vaduz	47.1333	9.51667	LI	Europe		Cfb
Lithuania	Vilnius	54.6833	25.3167	LT	Europe		Dfb
Luxembourg	Luxembourg	49.6	6.11667	LU	Europe		Cfb
Macedonia	Skopje	42	21.4333	MK	Europe		Cfb
Madagascar	Antananarivo	-18.9167	47.5167	MG	Africa		Cwb
Malawi	Lilongwe	-13.9667	33.7833	MW	Africa		Cfa
Malaysia	Kuala Lumpur	3.16667	101.7	MY	Asia		Af
Maldives	Male	4.16667	73.5	MV	Asia		Am
Mali	Bamako	12.65	-8	ML	Africa		Aw
Malta	Valletta	35.8833	14.5	MT	Europe		Csa
Marshall Islands	Majuro	7.1	171.383	MH	Australia		Af
Mauritania	Nouakchott	18.0667	-15.9667	MR	Africa		BWh
Mauritius	Port Louis	-20.15	57.4833	MU	Africa		Am
Mexico	Mexico City	19.4333	-99.1333	MX	Central America		Cwb
Federated States of Micronesia	Palikir	6.91667	158.15	FM	Australia		Af
Moldova	Chisinau	47	28.85	MD	Europe		Cfa
Monaco	Monaco	43.7333	7.41667	MC	Europe		Csb
Mongolia	Ulaanbaatar	47.9167	106.917	MN	Asia		BSk
Montenegro	Podgorica	42.4333	19.2667	ME	Europe		Cfa
Montserrat	Plymouth	16.7	-62.2167	MS	North America		Am
Morocco	Rabat	34.0167	-6.81667	MA	Africa		Csa
Mozambique	Maputo	-25.95	32.5833	MZ	Africa		Aw
Namibia	Windhoek	-22.5667	17.0833	NA	Africa		BSh
Nepal	Kathmandu	27.7167	85.3167	NP	Asia		Cfa
Netherlands	Amsterdam	52.35	4.91667	NL	Europe		Cfb
New Caledonia	Noumea	-22.2667	166.45	NC	Australia		Af
New Zealand	Wellington	-41.3	174.783	NZ	Australia		Cfb
Nicaragua	Managua	12.1333	-86.25	NI	Central America		Aw
Niger	Niamey	13.5167	2.11667	NE	Africa		BSh
Nigeria	Abuja	9.08333	7.53333	NG	Africa		Aw
Niue	Alofi	-19.0167	-169.917	NU	Australia		Af
Northern Mariana Islands	Saipan	15.2	145.75	MP	Australia		Af
Norway	Oslo	59.9167	10.75	NO	Europe		Dfb
Oman	Muscat	23.6167	58.5833	OM	Asia		BWh
Pakistan	Islamabad	33.6833	73.05	PK	Asia		Cfa
Palau	Melekeok	7.48333	134.633	PW	Australia		Af
Panama	Panama City	8.96667	-79.5333	PA	Central America		Am
Papua New Guinea	Port Moresby	-9.45	147.183	PG	Australia		Af
Paraguay	Asuncion	-25.2667	-57.6667	PY	South America		Cfa
Peru	Lima	-12.05	-77.05	PE	South America		BWh
Philippines	Manila	14.6	120.967	PH	Asia		Af
Pitcairn Islands	Adamstown	-25.0667	-130.083	PN	Australia		Af
Poland	Warsaw	52.25	21	PL	Europe		Cfb
Portugal	Lisbon	38.7167	-9.13333	PT	Europe		Csa
Puerto Rico	San Juan	18.4667	-66.1167	PR	North America		Am
Qatar	Doha	25.2833	51.5333	QA	Asia		BWh
Romania	Bucharest	44.4333	26.1	RO	Europe		Cfa
Russia	Moscow	55.75	37.6	RU	Europe		Dfb
Rwanda	Kigali	-1.95	30.05	RW	Africa		Aw
Saint Barthelemy	Gustavia	17.8833	-62.85	BL	North America		Aw
Saint Helena	Jamestown	-15.9333	-5.71667	SH	Africa		Af
Saint Kitts and Nevis	Basseterre	17.3	-62.7167	KN	North America		Aw
Saint Lucia	Castries	14	-61	LC	North America		Af
Saint Pierre and Miquelon	Saint-Pierre	46.7667	-56.1833	PM	Central America		Dfb
Saint Vincent and the Grenadines	Kingstown	13.1333	-61.2167	VC	Central America		Af
Samoa	Apia	-13.8167	-171.767	WS	Australia		Af
San Marino	San Marino	43.9333	12.4167	SM	Europe		Cfa
Sao Tome and Principe	Sao Tome	0.333333	6.73333	ST	Africa		Aw
Saudi Arabia	Riyadh	24.65	46.7	SA	Asia		BWh
Senegal	Dakar	14.7333	-17.6333	SN	Africa		BSh
Serbia	Belgrade	44.8333	20.5	RS	Europe		Cfa
Seychelles	Victoria	-4.61667	55.45	SC	Africa		Af
Sierra Leone	Freetown	8.48333	-13.2333	SL	Africa		Am
Singapore	Singapore	1.28333	103.85	SG	Asia		Af
Sint Maarten	Philipsburg	18.0167	-63.0333	SX	North America		Aw
Slovakia	Bratislava	48.15	17.1167	SK	Europe		Cfb
Slovenia	Ljubljana	46.05	14.5167	SI	Europe		Cfb
Solomon Islands	Honiara	-9.43333	159.95	SB	Australia		Af
Somalia	Mogadishu	2.06667	45.3333	SO	Africa		BSh
South Africa	Pretoria	-25.7	28.2167	ZA	Africa		Cfa
South Sudan	Juba	4.85	31.6167	SS	Africa		Aw
Spain	Madrid	40.4	-3.68333	ES	Europe		Csa
Sri Lanka	Colombo	6.91667	79.8333	LK	Asia		Af
Sudan	Khartoum	15.6	32.5333	SD	Africa		BWh
Suriname	Paramaribo	5.83333	-55.1667	SR	South America		Af
Svalbard	Longyearbyen	78.2167	15.6333	SJ	Europe		ET
Swaziland	Mbabane	-26.3167	31.1333	SZ	Africa		Cfa	Cwb
Sweden	Stockholm	59.3333	18.05	SE	Europe		Dfb
Switzerland	Bern	46.9167	7.46667	CH	Europe		Cfb
Syria	Damascus	33.5	36.3	SY	Asia		BSk
Taiwan	Taipei	25.0333	121.517	TW	Asia		Cfa
Tajikistan	Dushanbe	38.55	68.7667	TJ	Asia		Csa	Dfb
Tanzania	Dar es Salaam	-6.8	39.2833	TZ	Africa		Aw
Thailand	Bangkok	13.75	100.517	TH	Asia		Aw
Timor-Leste	Dili	-8.58333	125.6	TL	Asia		Aw
Togo	Lome	6.11667	1.21667	TG	Africa		Aw
Tonga	Nuku'alofa	-21.1333	-175.2	TO	Australia		Af
Trinidad and Tobago	Port of Spain	10.65	-61.5167	TT	North America		Am
Tunisia	Tunis	36.8	10.1833	TN	Africa		Csa
Turkey	Ankara	39.9333	32.8667	TR	Europe		Csb
Turkmenistan	Ashgabat	37.95	58.3833	TM	Asia		BSk
Turks and Caicos Islands	Grand Turk	21.4667	-71.1333	TC	North America		Aw
Tuvalu	Funafuti	-8.51667	179.217	TV	Australia		Af
Uganda	Kampala	0.316667	32.55	UG	Africa		Am
Ukraine	Kyiv	50.4333	30.5167	UA	Europe		Dfb
United Arab Emirates	Abu Dhabi	24.4667	54.3667	AE	Asia		BWh
United Kingdom	London	51.5	-0.083333	GB	Europe		Cfb
United States	Washington	38.8833	-77	US	Central America		Cfa
Uruguay	Montevideo	-34.85	-56.1667	UY	South America		Cfa
Uzbekistan	Tashkent	41.3167	69.25	UZ	Asia		Csa
Vanuatu	Port-Vila	-17.7333	168.317	VU	Australia		Af
Venezuela	Caracas	10.4833	-66.8667	VE	South America		Aw
Vietnam	Hanoi	21.0333	105.85	VN	Asia		Cfa
US Virgin Islands	Charlotte Amalie	18.35	-64.9333	VI	North America		Am	Aw
Wallis and Futuna	Mata-Utu	-13.95	-171.933	WF	Australia		Af
Yemen	Sanaa	15.35	44.2	YE	Asia		BWk
Zambia	Lusaka	-15.4167	28.2833	ZM	Africa		Cfa	Cwa
Zimbabwe	Harare	-17.8167	31.0333	ZW	Africa		Cwb
